# Supplementary material for: A Candidate Antigen of the Recombinant Membrane Protein Derived from the Porcine Deltacoronavirus Synthetic Gene to Detect Seropositive Pigs
Source: MDPI journal article supplement (doi:10.3390/v15051049), 2023-04-25
Supplement: s1 [file s1]

Supplementary material

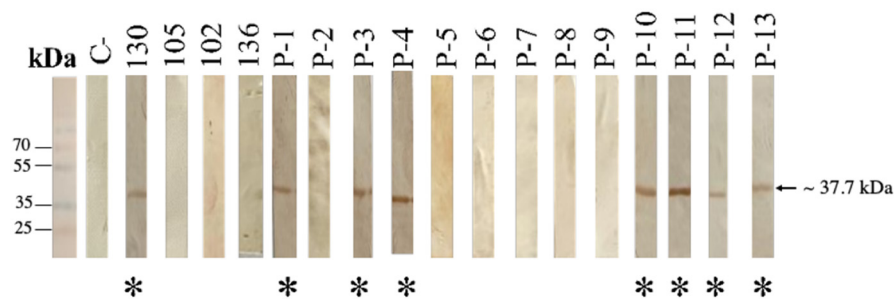

**Supplementary Figure S1.** Western blot analysis to detect positive ( $n = 8$ ) control sera of naturally infected pigs with PDCoV from “El Bajio” pig farm, and negative ( $n = 9$ ) control sera of non-infected pigs from a pathogen-free farm.
