# Supplementary material for: A Candidate Antigen of the Recombinant Membrane Protein Derived from the Porcine Deltacoronavirus Synthetic Gene to Detect Seropositive Pigs
Source: MDPI journal article supplement (doi:10.3390/v15051049), 2023-04-25
Supplement: s1 [file s1]

## Supplementary material

**Supplementary Table S1.** Characteristics of the 138 sequences available in GenBank were used in this study to determine the consensus sequence.

| No. | Access number | Country  | Strain                              | Year | Isolation source/Host |
|-----|---------------|----------|-------------------------------------|------|-----------------------|
| 1   | AXP32225.1    | China    | HNZK-04                             | 2018 | Swine                 |
| 2   | AXP32218.1    | China    | HNZK-02                             | 2018 | Swine                 |
| 3   | AXP32232.1    | China    | HNZK-06                             | 2018 | Swine                 |
| 4   | ALA13747.1    | China    | PDCoV/CHJXNI2/2015                  | 2015 | Swine                 |
| 5   | ASK86336.1    | China    | CH/JXJGS01/2016                     | 2016 | Piglet                |
| 6   | ASK86343.1    | China    | CH/JXJGS02/2016                     | 2016 | Piglet                |
| 7   | QBQ34483.1    | China    | CH/JXJGS01/2016                     | 2016 | Swine                 |
| 8   | QBQ34490.1    | China    | CH/JXJGS01/2016                     | 2016 | Swine                 |
| 9   | QBQ34497.1    | China    | CH/JXJGS01/P50                      | 2016 | Swine                 |
| 10  | QFU80843.1    | China    | CHN-JS-2017                         | 2017 | <i>Sus scrofa</i>     |
| 11  | ATJ00131.1    | China    | HB-BD-1                             | 2017 | Swine                 |
| 12  | AHM88402.1    | USA      | USA/IA/2014/8734                    | 2014 | Swine                 |
| 13  | AIA60975.1    | USA      | IL2768                              | 2014 | Swine                 |
| 14  | AIA60982.1    | USA      | SD3424                              | 2014 | Swine                 |
| 15  | AIA60989.1    | USA      | KY4813                              | 2014 | Swine                 |
| 16  | AIA60996.1    | USA      | PA3148                              | 2014 | Swine                 |
| 17  | AIA61003.1    | USA      | NE3579                              | 2014 | Swine                 |
| 18  | AIA99520.1    | USA      | MI6148                              | 2014 | Swine                 |
| 19  | AIT11902.1    | Korea    | KNU14-04                            | 2014 | Feces                 |
| 20  | AKA97940.1    | USA      | USA/IL/2014/026PDV P11              | 2015 |                       |
| 21  | ALJ32187.1    | USA      | OH11846                             | 2015 | Swine                 |
| 22  | AQT34132.1    | Korea    | DH1                                 | 2017 | Swine                 |
| 23  | AQT34138.1    | Korea    | DH2                                 | 2017 | Porcine               |
| 24  | ARJ31776.1    | Korea    | KNU16-07                            | 2017 | Feces                 |
| 25  | QNT22076.1    | China    | CHzmd2019                           | 2019 | <i>Sus scrofa</i>     |
| 26  | AWV96582.1    | China    | CHN/QH/2017/1                       | 2017 | Feces                 |
| 27  | AWV96568.1    | China    | CHN/GS/2016/2                       | 2016 | Feces                 |
| 28  | AWV96575.1    | China    | CHN/GS/2017/1                       | 2017 | Feces                 |
| 29  | AWV96561.1    | China    | CHN/GS/2016/1                       | 2016 | Feces                 |
| 30  | QDF21513.1    | China    | CHN/Sichuan/2017                    | 2017 | Small intestine       |
| 31  | ALT00614.1    | China    | LN-DL-2014                          | 2014 | Small intestine       |
| 32  | ATV90796.1    | China    | CHN-GD16-03                         | 2016 | Swine                 |
| 33  | QHI08613.1    | China    | CH/GX/1468B/2017                    | 2017 | intestinal content    |
| 34  | QEX51275.1    | China    | CHN-XA18-35                         | 2018 | Swine                 |
| 35  | AML40897.1    | USA      | USA/Minnesota292/2014               | 2014 | Swine                 |
| 36  | ATP16465.1    | Vietnam  | P29 15 VN 1215                      | 2015 | Swine                 |
| 37  | AML40806.1    | USA      | USA/Indiana453/2014                 | 2014 | Swine                 |
| 38  | QDH76190.1    | China    | CHN-SC2015                          | 2015 | <i>Sus scrofa</i>     |
| 39  | QGZ00527.1    | China    | CHN/Sichuan/2019                    | 2019 | Small intestine       |
| 40  | QDP14513.1    | China    | CHN/Sichuan/2017 1                  | 2017 | Feces                 |
| 41  | QDH76196.1    | China    | SCNC201705                          | 2017 | <i>Sus scrofa</i>     |
| 42  | ATU88975.1    | China    | CHN-SC2015 2                        | 2016 | Swine                 |
| 43  | ASY98689.1    | China    | CHN-HG-2017                         | 2017 | <i>Sus scrofa</i>     |
| 44  | ANK58280.1    | Thailand | P24 15 NT1 1215/PDCoV/2015/Thailand | 2015 | intestine             |
| 45  | APC23093.1    | Thailand | NT1 1215                            | 2015 | intestine             |
| 46  | AMW88199.1    | Thailand | TT 1115                             | 2015 | intestine             |
| 47  | APC23094.1    | Thailand | BTL 0116                            | 2016 | Swine                 |
| 48  | ANK58273.1    | Thailand | P2 13 ST2 0313/PDCoV/0213/Thailand  | 2013 | Swine                 |
| 49  | AOM53029.1    | Laos     | P1 16 BTL 0115/PDCoV/2016/Lao       | 2016 | Small intestine       |
| 50  | ANK58266.1    | Thailand | P1 13 ST1 0213/PDCoV/0213/Thailand  | 2013 | intestine             |
| 51  | AMN91623.1    | Thailand | PDCoV/Swine/Thailand/S5011/2015     | 2015 | Jejunum               |
| 52  | AMN91629.1    | Thailand | PDCoV/Swine/Thailand/S5012/2015     | 2015 | Jejunum               |
| 53  | AMN91635.1    | Thailand | PDCoV/Swine/Thailand/S5013/2015     | 2015 | Feces                 |
| 52  | AMN91641.1    | Thailand | PDCoV/Swine/Thailand/S5014J/2015    | 2015 | Jejunum               |

|     |            |             |                                  |      |                              |
|-----|------------|-------------|----------------------------------|------|------------------------------|
| 55  | AMN91672.1 | Thailand    | PDCoV/Swine/Thailand/S5015L/2015 | 2015 | Swine                        |
| 56  | AMN91684.1 | Thailand    | PDCoV/Swine/Thailand/S5018/2015  | 2015 | Blood                        |
| 57  | AMN91690.1 | Thailand    | PDCoV/Swine/Thailand/S5019/2015  | 2015 | Blood                        |
| 58  | AMN91696.1 | Thailand    | PDCoV/Swine/Thailand/S5022/2015  | 2015 | Feces                        |
| 59  | AMN91708.1 | Thailand    | PDCoV/Swine/Thailand/S5024/2015  | 2015 | Feces                        |
| 60  | AMN91714.1 | Thailand    | PDCoV/Swine/Thailand/S5025/2015  | 2015 | Feces                        |
| 61  | QBF80903.1 | Vietnam     | P19 16 VN 0416                   | 2016 | intestine                    |
| 62  | QFU80843.1 | China       | CHN-JS-2017                      | 2017 | <i>Sus scrofa</i>            |
| 63  | QCO76965.1 | China       | Swine/CHN/SC/2018/1              | 2018 | Small intestine              |
| 64  | QDP14520.1 | China       | CHN/Sichuan/2018                 | 2018 | Small intestine              |
| 65  | QOP74992.1 | China       | HeN/swine/2015                   | 2015 | Fence                        |
| 66  | ASR75152.1 | China       | SD                               | 2014 | Feces                        |
| 67  | AUH28252.1 | China       | SHJS/SL/2016                     | 2016 | Swine                        |
| 68  | AVZ61084.1 | China       | CHN-HeB1-2017                    | 2017 | <i>Sus scrofa</i>            |
| 69  | QIV13101.1 | China       | CHN-GX09-2018                    | 2018 | Swine                        |
| 70  | QDO79111.1 | China       | CHN-GX01-2018                    | 2018 | Swine                        |
| 71  | QIV13081.1 | China       | CHN-GX11-2018                    | 2018 | Swine                        |
| 72  | QIV13088.1 | China       | CHN-GX12-2018                    | 2018 | Swine                        |
| 73  | QIV13094.1 | China       | CHN-GX81-2018                    | 2018 | Swine                        |
| 74  | AUG59166.1 | China       | CH/Jiangsu/2014                  | 2014 | Feces                        |
| 75  | ATV90800.1 | China       | CHN-GD16-05                      | 2016 | Swine                        |
| 76  | AKC54430.1 | China       | CHN-AH-2004                      | 2004 | Swine                        |
| 77  | APW35736.1 | China       | HB-BD-2                          | 2016 | Swine                        |
| 78  | APG38200.1 | China       | CHN/Tianjin/2016                 | 2016 | Feces                        |
| 79  | AVR48521.1 | China       | CHN-GD-2016                      | 2016 | LLC-PK cells                 |
| 80  | AYU65234.1 | China       | PDCoV/CHGD/2016                  | 2016 | Swine                        |
| 81  | QWE80494.1 | Haiti       | PDCoV/Haiti/Human/0081-4/2014    | 2014 | <i>Homo sapiens</i>          |
| 82  | QWE80510.1 | Haiti       | PDCoV/Haiti/Human/0329-4/2015    | 2015 | <i>Homo sapiens</i>          |
| 83  | AQS99155.1 | China       | CH-01                            | 2016 |                              |
| 84  | AUG59158.1 | China       | CH/Hunan/2014                    | 2014 | Feces                        |
| 85  | AKQ63085.1 | China       | CH/Sichuan/S27/2012              | 2017 | Feces                        |
| 86  | QUM93289.1 | China       | HNZK-04-P5                       | 2018 | Swine                        |
| 87  | QUM93296.1 | China       | HNZK-04-P15                      | 2018 | Swine                        |
| 88  | AKC54444.1 | China       | CHN-JS-2014                      | 2014 | Feces                        |
| 89  | ALD83758.1 | China       | CH/SXD1/2015                     | 2015 | Swine                        |
| 90  | AYP31080.1 | China       | CHN-HN-1601                      | 2016 | Feces                        |
| 91  | AML83918.1 | China       | CHN-LYG-2014                     | 2014 | Feces                        |
| 92  | AML40778.1 | USA         | USA/Minnesota442/2014            | 2014 | Swine                        |
| 93  | AML40785.1 | USA         | USA/Minnesota214/2014            | 2014 | Swine                        |
| 94  | AML40883.1 | USA         | USA/Ohio444/2014                 | 2014 | Swine                        |
| 95  | AML40890.1 | USA         | USA/Ohio445/2014                 | 2014 | Swine                        |
| 96  | ANI85827.1 | USA         | PDCoV/USA/Iowa136/2015           | 2015 | Feces                        |
| 97  | ANI85834.1 | USA         | PDCoV/USA/Minnesota140/2015      | 2015 | Feces                        |
| 98  | ANI85841.1 | USA         | PDCoV/USA/Nebraska137/2015       | 2015 | Feces                        |
| 99  | ANI85848.1 | USA         | PDCoV/USA/Nebraska145/2015       | 2015 | Feces                        |
| 100 | AML40855.1 | USA         | USA/NorthCarolina452/2014        | 2014 | Swine                        |
| 101 | BAZ95611.1 | Japan       | HKD/JPN/2016                     | 2016 | <i>Sus scrofa</i>            |
| 102 | APC23097.1 | Thailand    | VN 1 1215                        | 2015 | intestine                    |
| 103 | AML40904.1 | USA         | USA/Iowa459/2014                 | 2014 | Swine                        |
| 104 | BBA66307.1 | Japan       | AKT/JPN/2014                     | 2014 | <i>Sus scrofa domesticus</i> |
| 105 | BBA66328.1 | Japan       | IWT/JPN/2014                     | 2014 | <i>Sus scrofa domesticus</i> |
| 106 | AML40869.1 | USA         | USA/Nebraska209/2014             | 2014 | Swine                        |
| 107 | AML40876.1 | USA         | USA/Nebraska210/2014             | 2014 | Swine                        |
| 110 | AML40862.1 | USA         | USA/Minnesota159/2014            | 2014 | Swine                        |
| 111 | AML40841.1 | USA         | USA/Illinois272/2014             | 2014 | Swine                        |
| 112 | AML40848.1 | USA         | USA/Illinois273/2014             | 2014 | Swine                        |
| 113 | AML40606.1 | USA         | USA/Arkansas61/2015              | 2015 | Swine                        |
| 114 | AML40792.1 | USA         | USA/Michigan447/2014             | 2014 | Swine                        |
| 115 | AML40799.1 | USA         | USA/Michigan448/2014             | 2014 | Swine                        |
| 116 | AML40813.1 | USA         | USA/Illinois449/2014             | 2014 | Swine                        |
| 117 | AML40820.1 | USA         | USA/Minnesota/2013               | 2013 | Swine                        |
| 118 | AML40827.1 | USA         | USA/Minnesota454/2014            | 2014 | Swine                        |
| 119 | AML40834.1 | USA         | USA/Minnesota455/2014            | 2014 | Swine                        |
| 120 | ASS83088.1 | South Korea | KNU16-11                         | 2016 | Feces                        |
| 121 | BBA66314.1 | Japan       | GNM-1/JPN/2014                   | 2014 | <i>Sus scrofa domesticus</i> |
| 122 | BBA66321.1 | Japan       | GNM-2/JPN/2014                   | 2014 | <i>Sus scrofa domesticus</i> |

|     |                |             |                                 |      |                              |
|-----|----------------|-------------|---------------------------------|------|------------------------------|
| 123 | BBA66335.1     | Japan       | MYZ/JPN/2014                    | 2014 | <i>Sus scrofa domesticus</i> |
| 124 | BBA66342.1     | Japan       | OKN/JPN/2014                    | 2014 | <i>Sus scrofa domesticus</i> |
| 125 | BBA66349.1     | Japan       | YMG/JPN/2014                    | 2014 | <i>Sus scrofa domesticus</i> |
| 126 | QWE80502.1     | Haiti       | PDCoV/Haiti/Human/0256-1/2015   | 2015 | <i>Homo sapiens</i>          |
| 127 | AWG96867.1     | South Korea | KNU16-07-P5                     | 2016 | Swine                        |
| 128 | AWG96880.1     | South Korea | KNU16-07-P20                    | 2016 | Swine                        |
| 129 | QPI70914.1     | USA         | USA/IL/2014/026PDV P11 3        | 2019 | Swine                        |
| 130 | AKC54437.1     | China       | CHN-HB-2014                     | 2014 | Feces                        |
| 131 | ALT00617.1     | China       | SD-QD23-2014                    | 2014 | Feces                        |
| 132 | ALT00620.1     | China       | TJN2-2014                       | 2014 | Feces                        |
| 133 | APZ76692.1     | China       | PDCoV/Swine/Vietnam/HaNoi6/2015 | 2015 | Feces                        |
| 134 | ALT00612.1     | China       | HLJ-HH-2014                     | 2014 | small intestinal             |
| 135 | ALT00615.1     | China       | SD-QD3-2014                     | 2014 | Boar feces                   |
| 136 | ALS54088.1     | China       | CHN-HN-2014                     | 2014 | <i>Sus scrofa</i>            |
| 137 | AHN16222.1     | China       | OH1987                          | 2014 | Swine                        |
| 138 | YP_009513023.1 | China       | HKU15                           | 2012 | Swine                        |
